# Supplementary material for: A theoretical study of allopurinol drug sensing by carbon and boron nitride nanostructures: DFT, QTAIM, RDG, NBO and PCM insights
Source: Royal Society of Chemistry journal article supplement (doi:10.1039/d1ra06948a), 2021-01-01
Supplement: d1ra06948a1.pdf [file d1ra06948a1.pdf]

*Electronic supplementary information (ESI)*

**Theoretical study of allopurinol drug sensing by carbon and boron nitride nanostructures: A DFT, QAIM, RDG, NBO and PCM insight**

**Md. Helal Miah<sup>a</sup>, Md. Rakib Hossain<sup>a,\*</sup>, Md. Saiful Islam<sup>a</sup>, Tahmina Ferdous<sup>b</sup>, Farid Ahmed<sup>b</sup>**

<sup>a</sup>Department of Physics, Bangabandhu Sheikh Mujibur Rahman Science and Technology University, Gopalganj-8100, Bangladesh

<sup>b</sup>Department of Physics, Jahangirnagar University, Savar, Dhaka-1342, Bangladesh

\*Corresponding author: Email: rakibphy\_r@bsmrstu.edu.bd

## List of Figures

**Fig. S1** Optimized geometries, HOMO, LUMO and MEP of CS4-CS12 structures. The MEP surfaces are defined by 0.0004 electron/bohr<sup>3</sup> contour of the electronic density. The Red to blue ( - 0.01 a.u. to 0.01 a.u.) colour scheme for MEP surface by indicating the electron rich to electron deficient or partially negative charge to partially positive charge region of the surface respectively.

**Fig. S2** The molecular graphs, RDG Scatter Map, RDG isosurface and DOS of CS4 – CS12 structures.

## List of Tables

**Table S1** Structural properties of APN drug molecule.

**Table S2** The values of fractional number of charge transfer ( $\Delta N$ ), the change in individual energy of the donor molecule ( $\Delta E_{B(A)}$ ), the change in individual energy of the acceptor molecule ( $\Delta E_{A(B)}$ ) and total stabilization energy of conjugated structure ( $\Delta E_{SE(AB)}$ ).

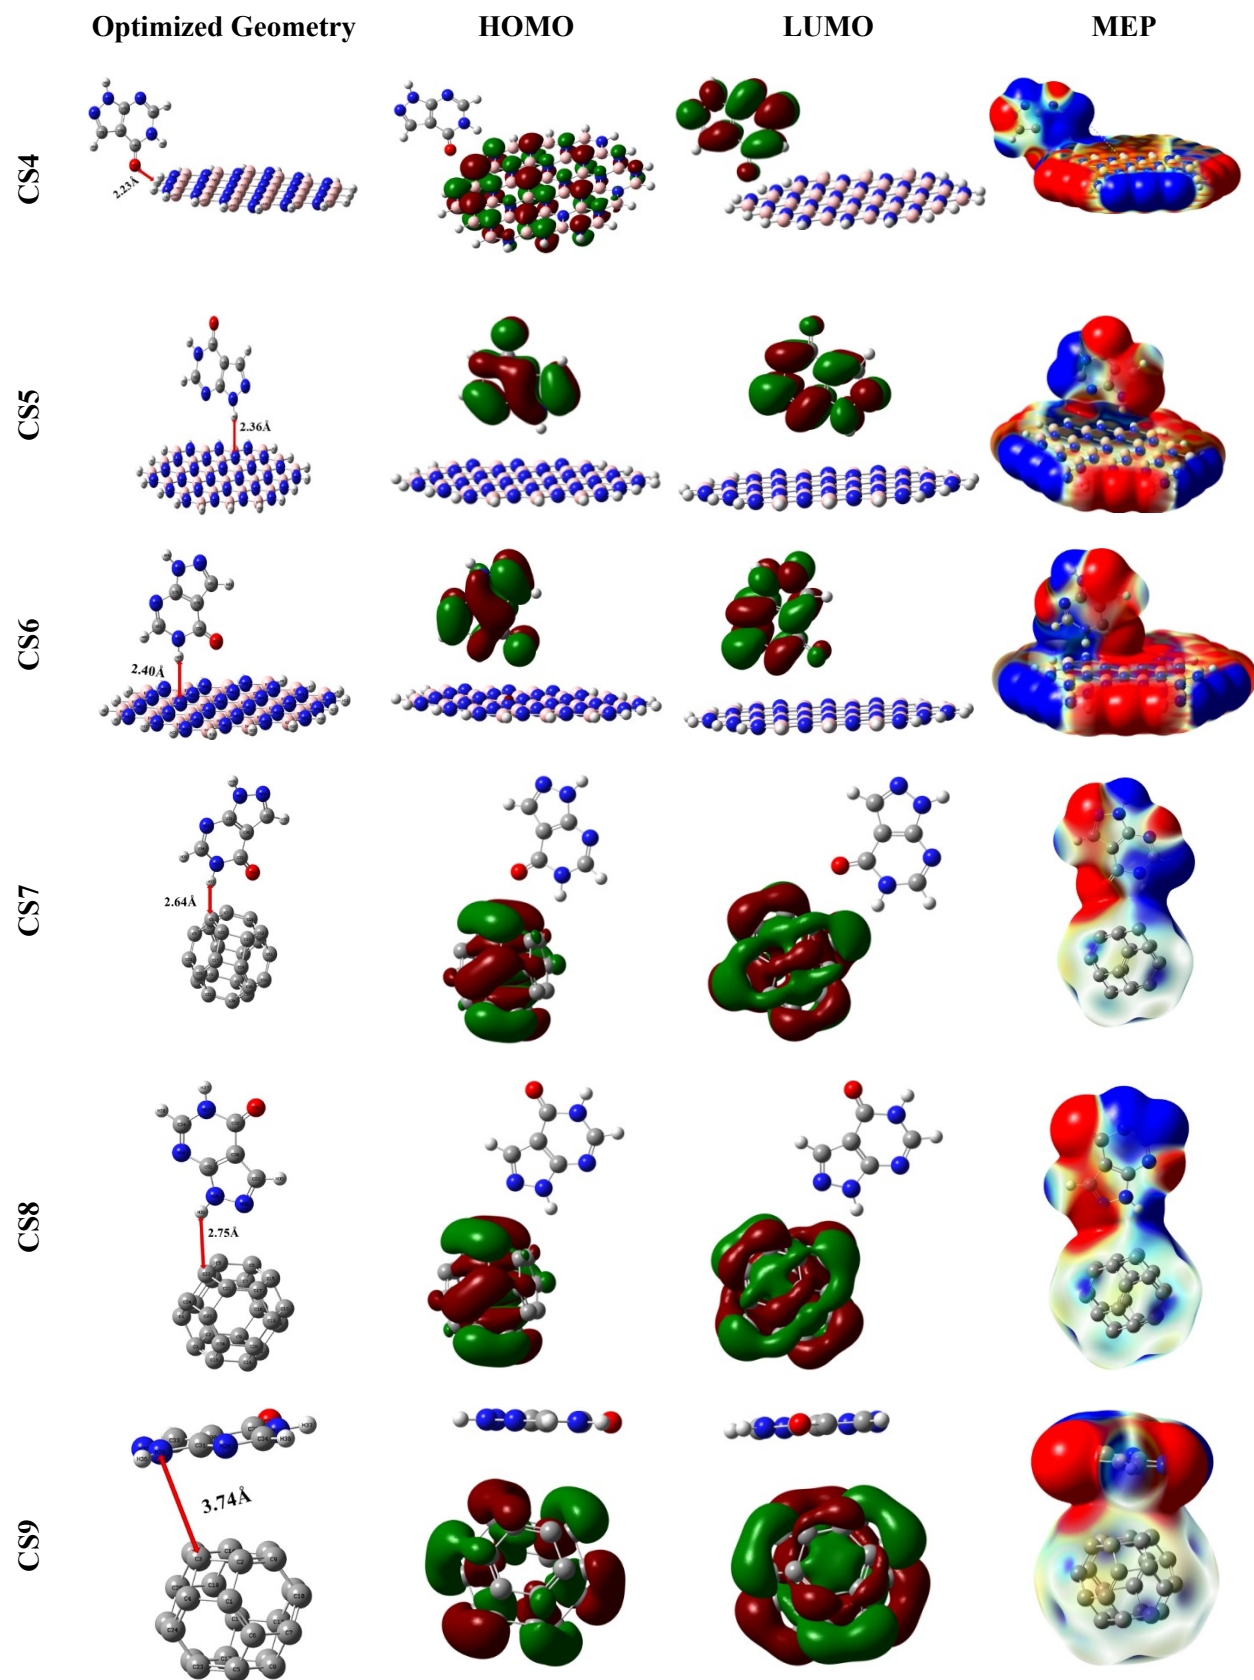

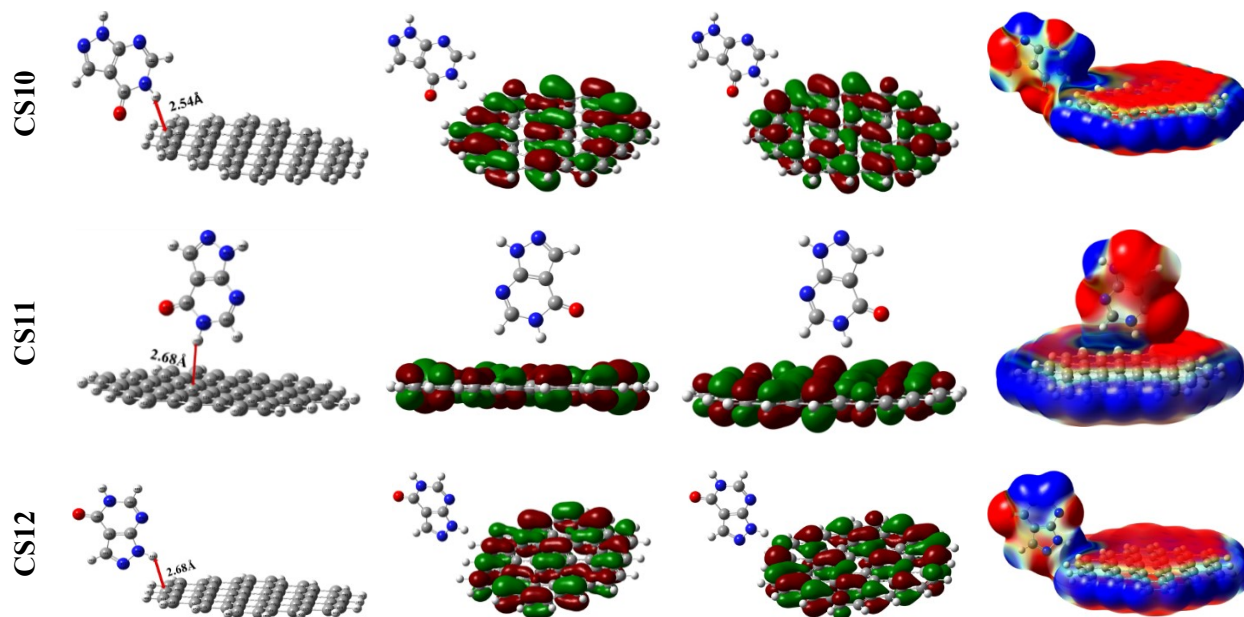

**Fig. S1:** Optimized geometries, HOMO, LUMO and MEP of CS4-CS12 structures. The MEP surfaces are defined by 0.0004 electron/bohr<sup>3</sup> contour of the electronic density. The Red to blue (- 0.01 a.u. to 0.01 a.u.) colour scheme for MEP surface by indicating the electron rich to electron deficient or partially negative charge to partially positive charge region of the surface respectively.

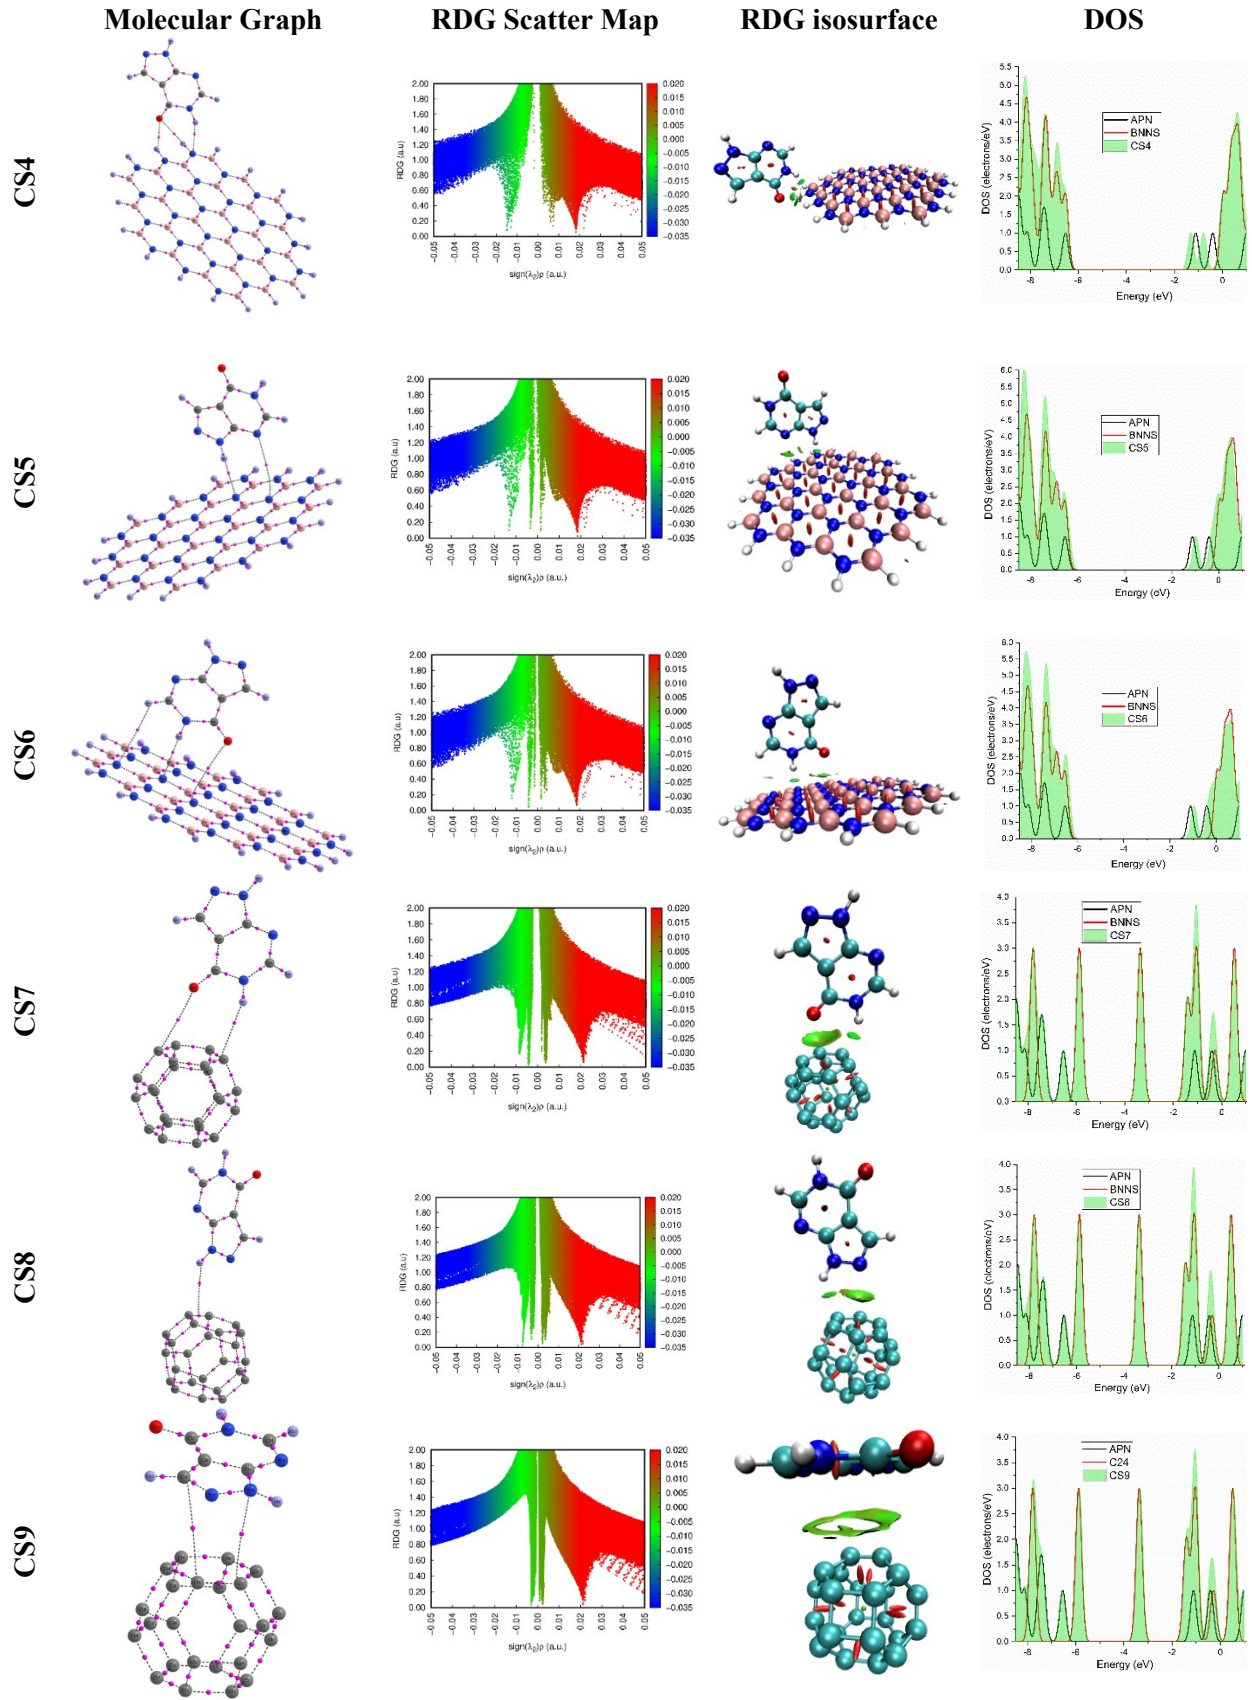

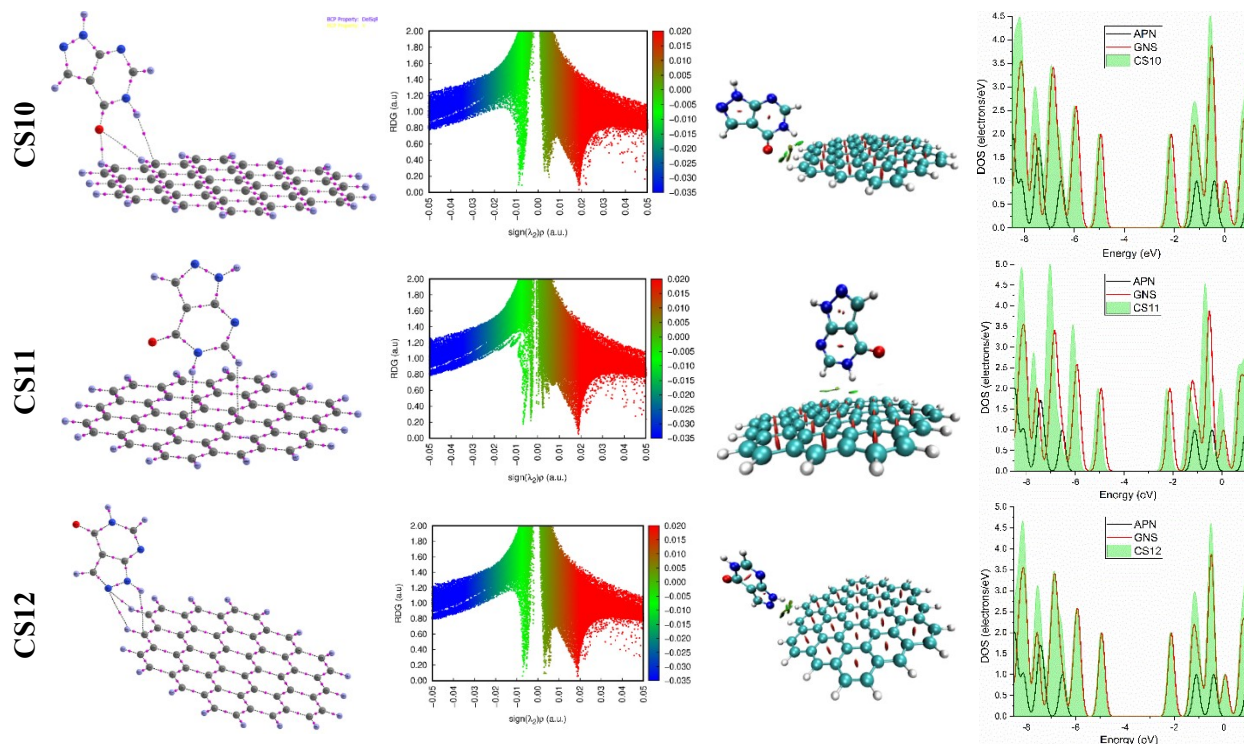

**Fig. S2:** The molecular graphs, RDG Scatter Map, RDG isosurface and DOS of CS4 – CS12 structures.

**Table S1:** Structural properties of APN drug molecule.

| Interatomic distance in Angstrom |                   |                   |      | Angle in Degree |                   |                   |       |
|----------------------------------|-------------------|-------------------|------|-----------------|-------------------|-------------------|-------|
| Interacting Atoms                | Our Investigation | B3LYP/6-311+(d,p) | HF   | Involved Atoms  | Our Investigation | B3LYP/6-311+(d,p) | HF    |
| O1-C8                            | 1.22              | 1.22              | 1.20 | ∠N5-N2-C7       | 112.7             | 112.5             | 112.2 |
|                                  |                   |                   |      | ∠N5-N2-H12      | 120.0             | 120               | 120.4 |
| N2-N5-                           | 1.36              | 1.36              | 1.35 | ∠C7-N2-H12      | 127.3             | 127.5             | 120.3 |
| N2-C7                            | 1.35              | 1.35              | 1.33 | ∠C8-N3-C10      | 125.8             | 125.7             | 125.4 |
|                                  |                   |                   |      | ∠C8-N3-H13      | 114.6             | 114.9             | 115.3 |
| N2-H12                           | 1.01              | 1.01              | 0.99 | ∠C10-N3-H13     | 119.6             | 119.4             | 119.3 |
| N3-C8                            | 1.43              | 1.43              | 1.41 | ∠C7-N4-C10      | 112.4             | 112.7             | 112.5 |
|                                  |                   |                   |      | ∠N2-N5-C9       | 105.3             | 105.6             | 106.1 |
| N3-C10                           | 1.37              | 1.37              | 1.36 | ∠C7-C6-C8       | 119.2             | 119.1             | 119.3 |
| N3-H13                           | 1.01              | 1.01              | 1.00 | ∠C7-C6-C9       | 104.8             | 104.8             | 104.3 |
|                                  |                   |                   |      | ∠C8-C6-C9       | 136.0             | 136.1             | 136.4 |
| N4-C7                            | 1.37              | 1.37              | 1.37 | ∠N2-C7-N4       | 126.0             | 125.1             | 126   |
| N4-C10                           | 1.31              | 1.30              | 1.28 | ∠N2-C7-C6       | 106.0             | 106               | 106.6 |
|                                  |                   |                   |      | ∠N4-C7-C6       | 128.1             | 127.9             | 127.4 |
| N5-C9                            | 1.33              | 1.32              | 1.30 | ∠O1-C8-N3       | 120.3             | 120.3             | 120.3 |
| C6-C7                            | 1.40              | 1.4               | 1.39 | ∠O1-C8-C6       | 130.1             | 129.9             | 129.9 |
|                                  |                   |                   |      | ∠N3-C8-C6       | 109.6             | 109.8             | 109.8 |
| C6-C8                            | 1.44              | 1.44              | 1.44 | ∠N5-C9-C6       | 111.3             | 111               | 110.8 |
| C6-C9                            | 1.42              | 1.42              | 1.42 | ∠N5-C9-H11      | 120.2             | 120.2             | 120.8 |
|                                  |                   |                   |      | ∠C6-C9-H11      | 128.5             | 128.7             | 128.4 |
| C9-H11                           | 1.08              | 1.08              | 1.07 | ∠N3-C10-N4      | 125.0             | 124.9             | 125.6 |
|                                  |                   |                   |      | ∠N3-C10-H14     | 115.7             | 115.8             | 115.3 |
| C10-H14                          | 1.09              | 1.09              | 1.08 | ∠N4-C10-H14     | 119.3             | 119.4             | 119.1 |

**Table S2:** The values of fractional number of charge transfer ( $\Delta N$ ), the change in individual energy of the donor molecule ( $\Delta E_{B(A)}$ ), the change in individual energy of the acceptor molecule ( $\Delta E_{A(B)}$ ) and total stabilization energy of conjugated structure ( $\Delta E_{SE(AB)}$ ).

| <b>Systems</b>  | $\Delta N$ | $\Delta E_{A(B)}(\text{eV})$ | $\Delta E_{B(A)}(\text{eV})$ | $\Delta E_{SE(AB)}(\text{eV})$ |
|-----------------|------------|------------------------------|------------------------------|--------------------------------|
| <b>APN-BNNC</b> | -0.08      | 0.30                         | -0.32                        | -0.02                          |
| <b>APN-BNNS</b> | 0.09       | -0.33                        | 0.31                         | -0.02                          |
| <b>APN-CNC</b>  | -0.20      | 0.82                         | -0.90                        | -0.08                          |
| <b>APN-GNS</b>  | 0.07       | -0.26                        | 0.25                         | -0.01                          |
